# Supplementary material for: Water Efficiency Households Retrofit Proposal Based on Rainwater Quality in Acapulco, Mexico
Source: MDPI journal article supplement (doi:10.3390/w14182927), 2022-09-19
Supplement: s1 [file s1]

Archive with 1 entries (1 files):
- water-1883744-supplementary.pdf
